# Supplementary material for: [Retracted] Antileukemic Effects of Anti‐miR‐146a, Anti‐miR‐155, Anti‐miR‐181a, and Prednisolone on Childhood Acute Lymphoblastic Leukemia
Source: Hindawi journal article supplement (doi:10.1155/2021/3207328), 2021-01-01
Supplement: f1 [file 3207328.f1.zip]

Archive with 8 entries (8 files):
- Supplementary Figure 1a.pdf
- Supplementary Figure 1b.pdf
- Supplementary Figure 2a.pdf
- Supplementary Figure 2b.pdf
- Supplementary Figure 3a.pdf
- Supplementary Figure 3b.pdf
- Supplementary Figure 4a.pdf
- Supplementary Figure 4b.pdf
